# Supplementary material
Source: PubMed Central journal article supplement (PMC7338890)

Supplemental Figure S1

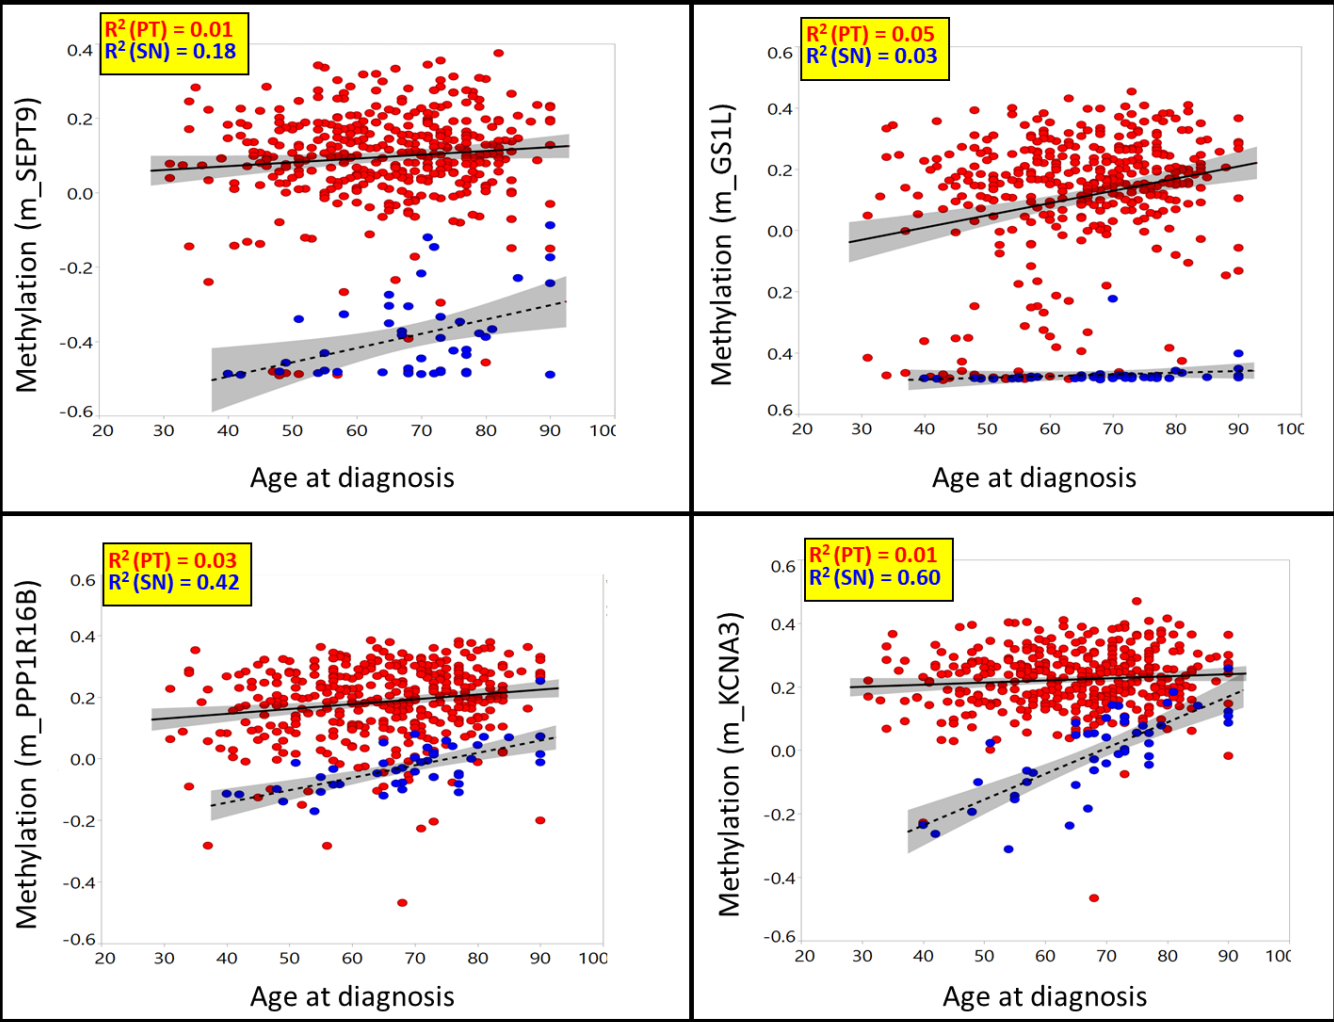

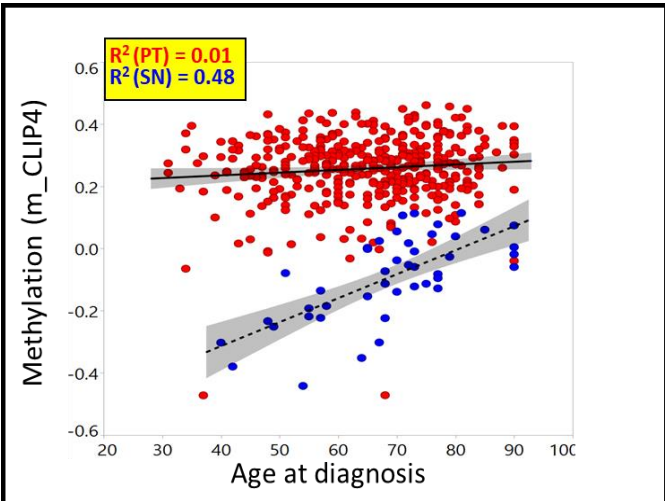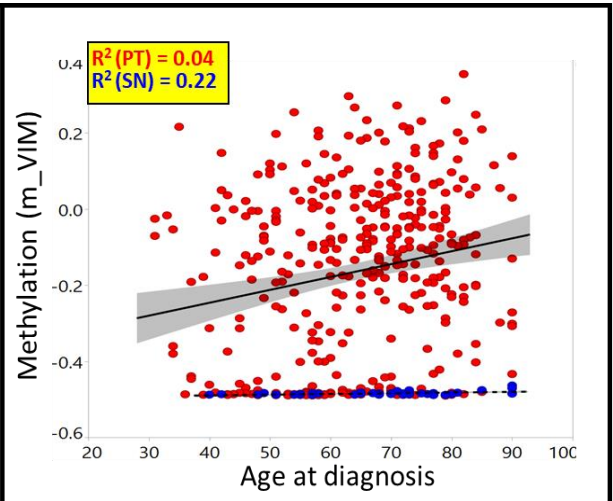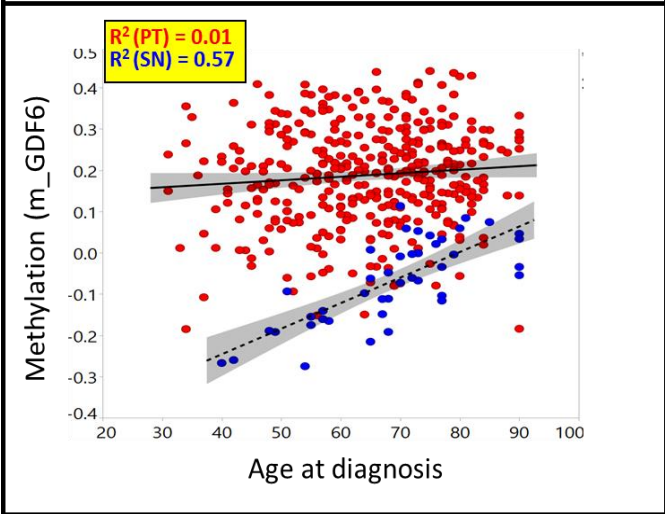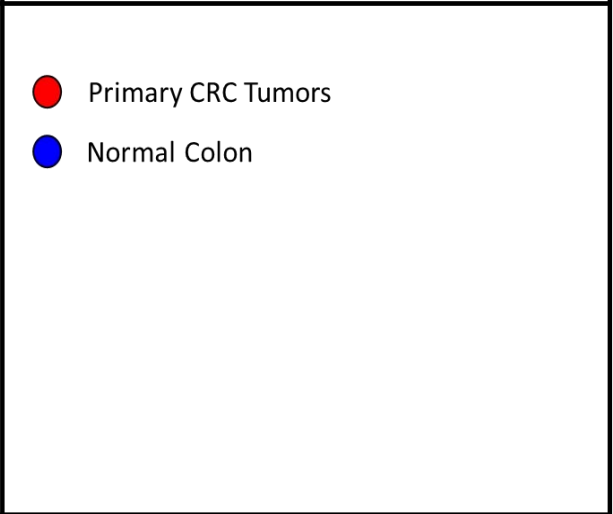

Supplement: mmc1.pdf [file mmc1.pdf]
